# Supplementary material
Source: Springer Nature journal article supplement (https://www.springermedizin.de/resource/supplementary/12943_2010_812_MOESM7_ESM.pdf/9554888)

### A Siramesine

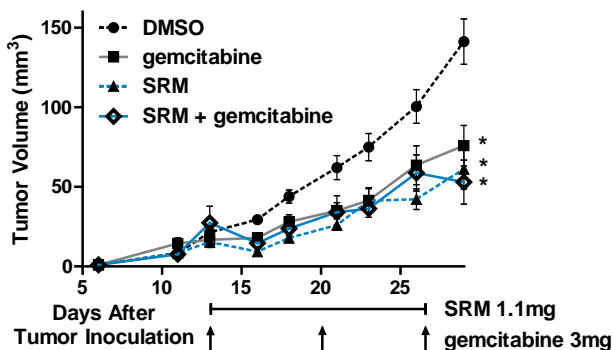

### B SV119

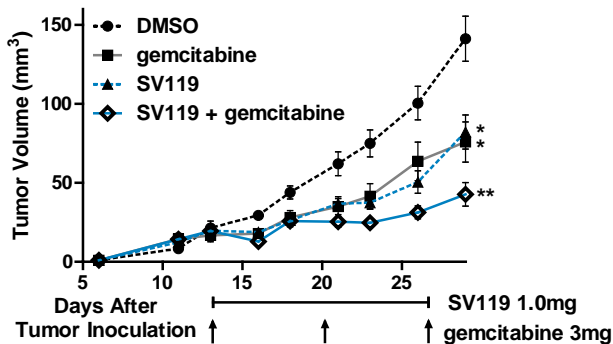

### C SW43

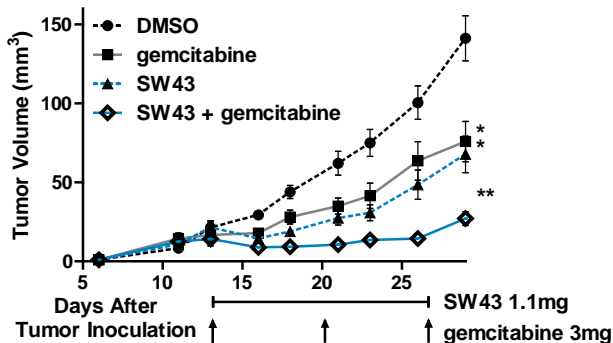

Supplement: MOESM7 [file 9554888]
